# Supplementary material for: Insights into glyphosate removal efficiency using a new 2D nanomaterial
Source: Royal Society of Chemistry journal article supplement (doi:10.1039/d2ra00385f), 2022-01-01
Supplement: d2ra00385f1.pdf [file d2ra00385f1.pdf]

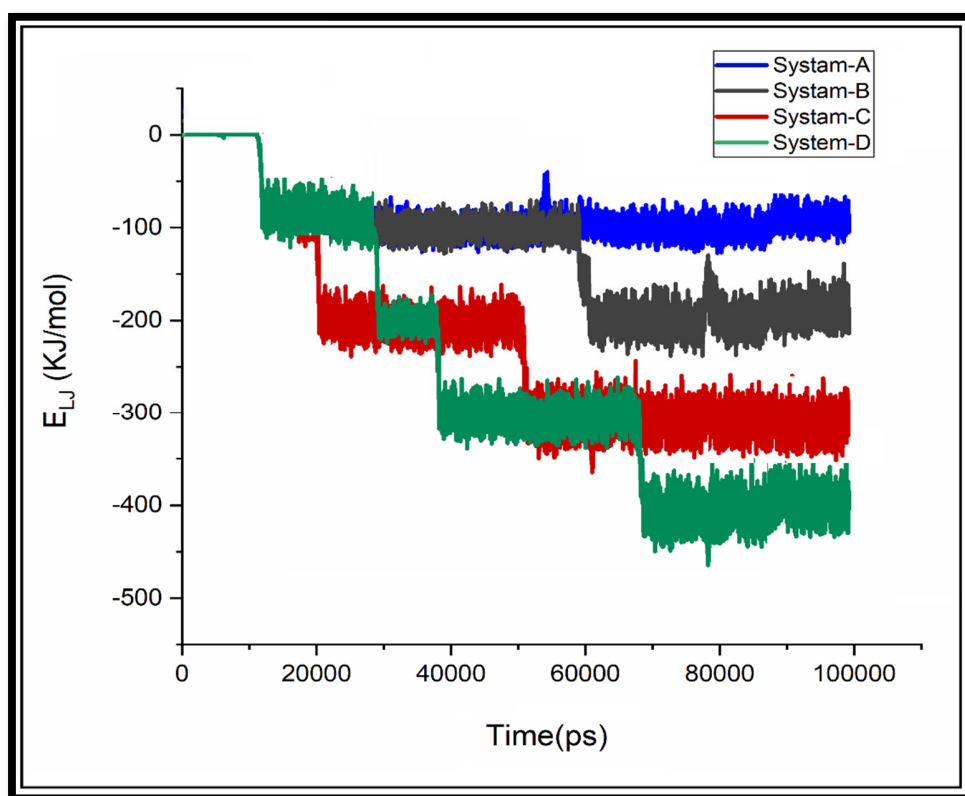

**Figure S1.** The L-J interaction energy between the pollutant molecules and SNS as a function of simulation time.

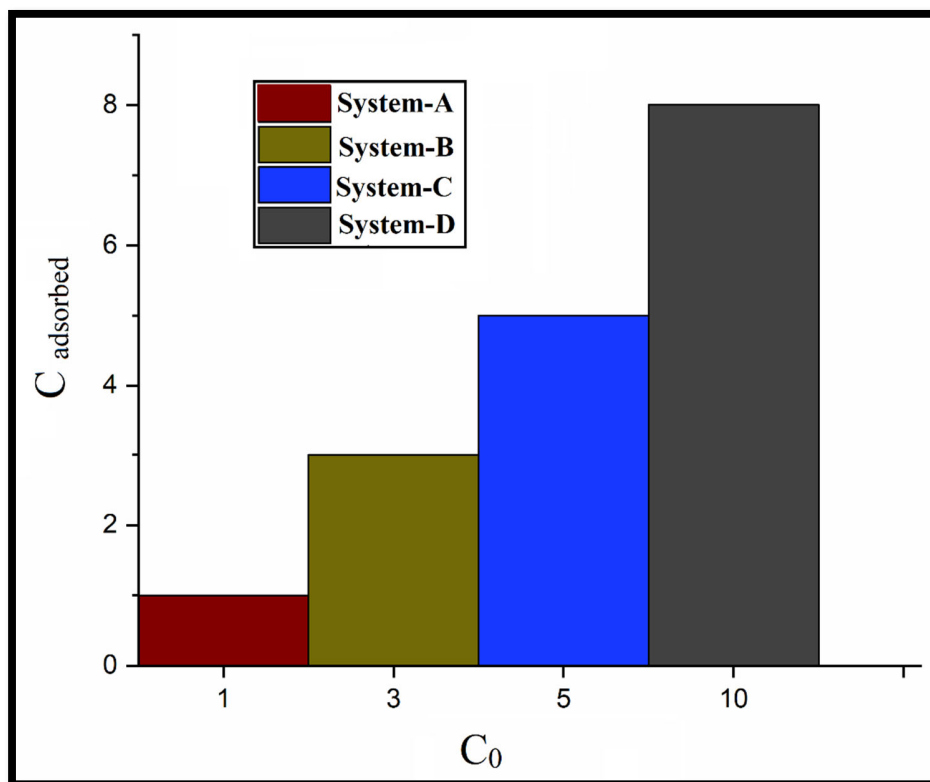

**Figure S2.** The number of adsorbed GLY molecules on SNS ( $C_{\text{adsorbed}}$ ) versus initial concentrations of GLY ( $C_0$ )

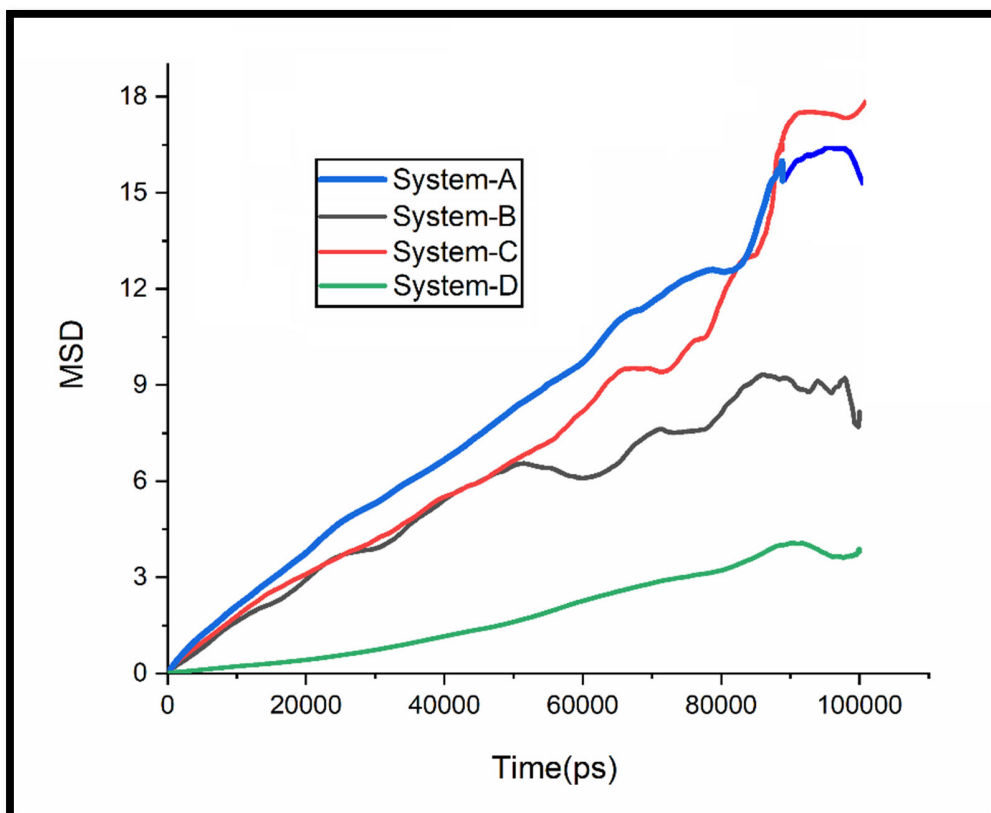

**Figure S3.** Time evolutions of MSD of GLY in all of the studied complexes.

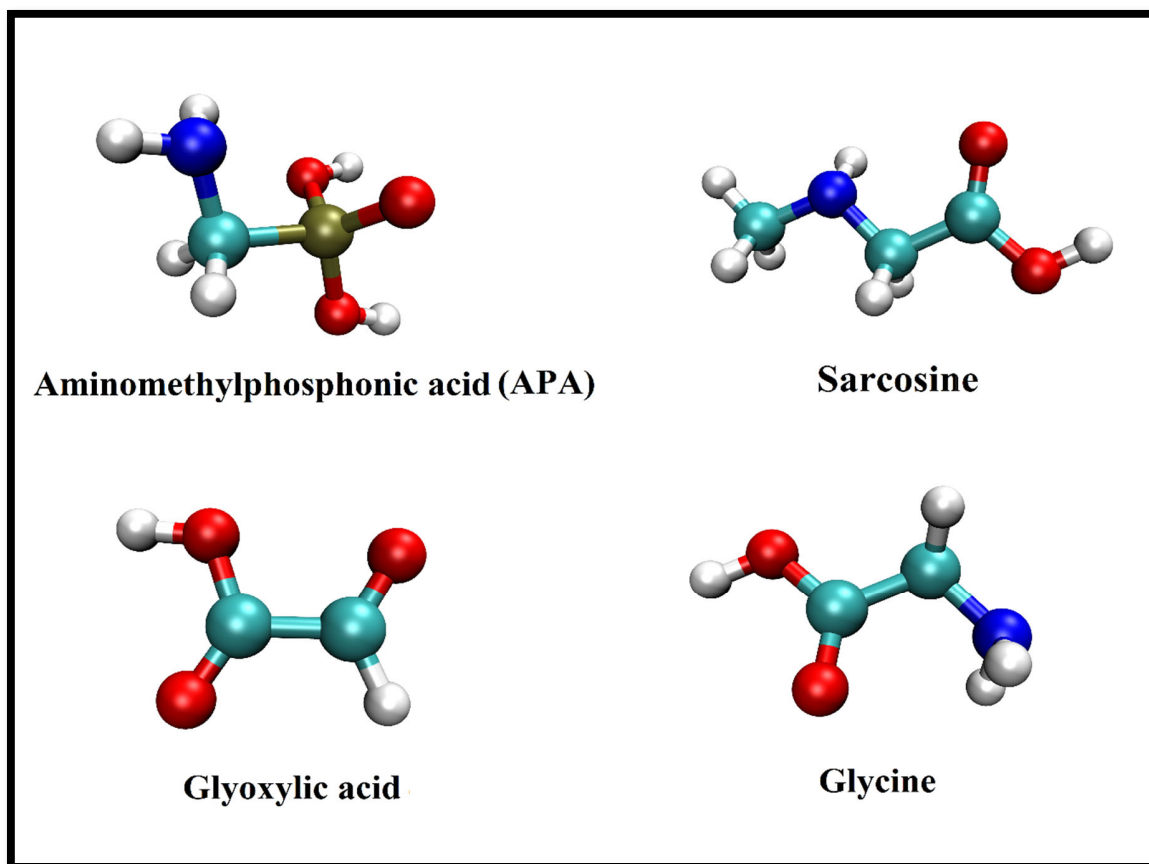

**Figure S4.** The GLY and the main products of the degradation processes.

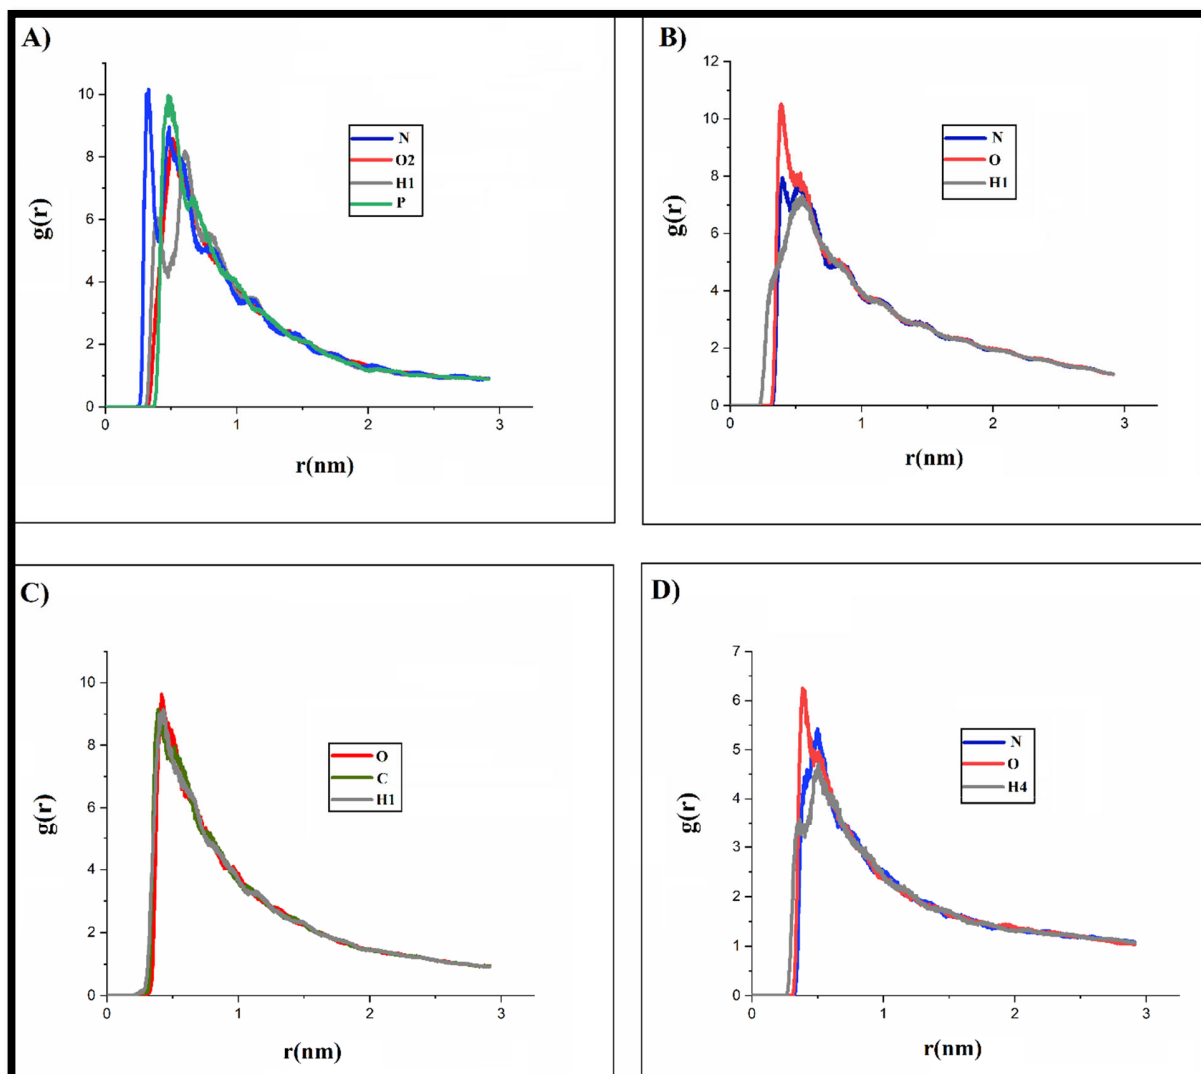

**Figure S5.** Atomic radial distribution function of the **A)** SNS@APA **B)** SNS@ SAR **C)** SNS@ GLA and **D)** SNS@ GLC complexes.

**Table S1.** Adsorption energy values for different glyphosate-adsorbent complexes. GOX (Glyphosate oxidoreductase). All energy values are in kJ/mol.

| Complexes            | $\Delta E_{\text{ads}}$ (kJ/mol) | Ref. |
|----------------------|----------------------------------|------|
| GOX–glyphosate       | -22.68                           | [3]  |
| C–P-lyase–glyphosate | -18.06                           | [3]  |
| NU-1000–glyphosate   | -37.63                           | [41] |
| NiO-67– glyphosate   | -17.37                           | [41] |

**Table S2.** The obtained pair interaction energy between different components of the investigated systems at the first (0 ns) and the last (75 ns) of the MD production. (all in  $\text{kJ mol}^{-1}$ )

| Time     | L-J  |         | Coul |        | Total   |
|----------|------|---------|------|--------|---------|
|          | 0 ns | 100 ns  | 0 ns | 100 ns | -       |
| System-A | 0    | -75.95  | 0    | -3.01  | -78.96  |
| System-B | 0    | -175.35 | 0    | -2.11  | -177.46 |
| System-C | 0    | -338.78 | 0    | -4.31  | -343.09 |
| System-D | 0    | -442.08 | 0    | -6.43  | -448.51 |
